# Supplementary material
Source: PubMed Central journal article supplement (PMC3318277)
Supplement: supp_19.4.499_CVI-CVI05706-11-s01.pdf [file supp_19.4.499_CVI-CVI05706-11-s01.pdf]

Supplemental Figure 1

D39- PspC3 -----  
HU1- PspC6 -----  
HU3- PspC8 -----  
HU4- PspC3 -----  
HU5- PspC3 -----  
HU6A- PspC3 -----  
HU6B- PspC4 -----  
HU6B- PspC10 1 TEREGSTQAATSSKMANESQIERRKAAEQAIVSLSGYMTSLNDGLDTSRFEELLKRAKGIVEEYRKKIDGASDREKI 80  
HU7F- PspC6 -----  
HU9V- PspC3 -----  
HU14- PspC3 -----  
HU18C- PspC6 -----  
HU19A- PspC5 -----  
HU19F- PspC9 -----  
HU23F- PspC3 -----

D39- PspC3 -----  
HU1- PspC6 -----  
HU3- PspC8 -----  
HU4- PspC3 -----  
HU5- PspC3 -----  
HU6A- PspC3 -----  
HU6B- PspC4 -----  
HU6B- PspC10 81 EKLQQEGQTKLDELVDKFKKGLSSSEQNGHATPKDPSRNDGVQGDDSSVGQGEQPGASNQKNPESVPPTASGETDSPTKP 160  
HU7F- PspC6 -----  
HU9V- PspC3 -----  
HU14- PspC3 -----  
HU18C- PspC6 -----  
HU19A- PspC5 -----  
HU19F- PspC9 -----  
HU23F- PspC3 -----

|        |        |     |                                                                                 |     |
|--------|--------|-----|---------------------------------------------------------------------------------|-----|
| D39-   | PspC3  | 1   | -----TENEGS                                                                     | 6   |
| HU1-   | PspC6  | 1   | -----EGVGG                                                                      | 5   |
| HU3-   | PspC8  | 1   | -----TENEGS                                                                     | 6   |
| HU4-   | PspC3  | 1   | -----TEKEVT                                                                     | 6   |
| HU5-   | PspC3  | 1   | -----TEN                                                                        | 3   |
| HU6A-  | PspC3  | 1   | -----TENEGS                                                                     | 6   |
| HU6B-  | PspC4  | 1   | -----EGVRS                                                                      | 5   |
| HU6B-  | PspC10 | 161 | KTSNDSVNSLERELKEVKETAKTTLNTYMLTRLKQENPGVFWFADLLRESKESVEKYKRMFDEASSKENVENLVKEAQE | 240 |
| HU7F-  | PspC6  | 1   | -----EGVRS                                                                      | 5   |
| HU9V-  | PspC3  | 1   | -----TEKEVT                                                                     | 6   |
| HU14-  | PspC3  | 1   | -----TEKEVT                                                                     | 6   |
| HU18C- | PspC6  | 1   | -----EEVGG                                                                      | 5   |
| HU19A- | PspC5  | 1   | -----TENEGI                                                                     | 6   |
| HU19F- | PspC9  | 1   | -----TEKEGS                                                                     | 6   |
| HU23F- | PspC3  | 1   | -----TENEGS                                                                     | 6   |

|        |        |     |                                                                                           |     |
|--------|--------|-----|-------------------------------------------------------------------------------------------|-----|
| D39-   | PspC3  | 7   | TQAATSSNMA---KT-----EHRKAAKQV-----VDEYIEKMLREIQ--LDRRK--HTQNVALNKL <del>SAIKT</del>       | 61  |
| HU1-   | PspC6  | 6   | RNTSTVTSSGQD-----TSKKYADEV-----KSHYQSILEKVRKSLEKDR--HTQNVGLITKLSEIKK                      | 61  |
| HU3-   | PspC8  | 7   | TQAATFSNMANKSQTEQ-GQINIERDKAKTAV-----SEYKEKKVSEIYTKLERDR--HKDTVDLVNKLQEIKN                | 72  |
| HU4-   | PspC3  | 7   | TQVATSSNKANKSQT-----EHMKAAKQV-----DEYIKKKL---Q--LDRRK--HTQNVGLLTKLGVIKT                   | 60  |
| HU5-   | PspC3  | 4   | EGTTQVATSSNK-----ANKSQTEHM-----KAAKQ-VDEYIKKMLQLDRRKHTQNVGLLTKLGAIKT                      | 60  |
| HU6A-  | PspC3  | 7   | TQAATSSNMA---KT-----EHRKAAKQV-----VDEYIEKMLREIQ--LDRRK--HTQNF <del>AFNMKLSAIKT</del>      | 61  |
| HU6B-  | PspC4  | 6   | KNNLTVTSSGQD-----ISKKYADEV-----ESHLQSILKDVNKNLKKVQ--HTQNVDFNKKLSRIKT                      | 61  |
| HU6B-  | PspC10 | 241 | IEALVVKHKGR-----EIDLERTKAKTVI-----AKYLTGLLDDIKKNLKKKEQ--HINTVELIKKLGDIKR                  | 299 |
| HU7F-  | PspC6  | 6   | GNNSTVTSSG---QD-----ISKKYADEV-----KSHLEKILSEIQTNLDRSK--HIKTVNLINKLQDIKR                   | 61  |
| HU9V-  | PspC3  | 7   | TQVATSSNKANKSQT-----EHMKAAKQV-----DEYIKKKL---Q--LDRRK--HTQNVGLLTKLGVIKT                   | 60  |
| HU14-  | PspC3  | 7   | TQVATSSNKANKSQT-----EHMKAAKQV-----DEYIKKKL---Q--LDRRK--HTQNVGLLTKLGVIKT                   | 60  |
| HU18C- | PspC6  | 6   | RNTPTVTSSG---QD-----ISKKYADEV-----KSHLEEMLSGIK--LDRRK--HTQNFNFNKKLSIIQT                   | 59  |
| HU19A- | PspC5  | 7   | TQVATSYNKANESQT-----EHRKAAKQVDEDIKKMLSEIQEYIKKMLSEIQ--LDRRK--HTQNVNINRKL <del>SAIQT</del> | 74  |
| HU19F- | PspC9  | 7   | TQAATSFNRGNQSQAQEQRGELDLERDKAMKAV-----SEYVGKMRDAYVKSDRKR--HKNTVALV <del>NQIGNIKN</del>    | 73  |
| HU23F- | PspC3  | 7   | TQAATSSNMA---KT-----EHRKAAKQV-----VDEYIEKMLREIQ--LDRRK--HTQNF <del>AFNMKLSAIKT</del>      | 61  |

D39- PspC3 62 KYLRELNVL---EESKDE-LPSEIKAKLDAAFEKFKKDTL--KPGEKVAEAKKKVVEEAKKKAEDQKEEDRRNYPTNTYK 135  
 HU1- PspC6 62 KYLYELEVNVLLEEKSKAE-LPSKAKAELDAAFEQFKKEP----- 100  
 HU3- PspC8 73 EYLNKIVEST--SKIEIQG-LITTSRSLDEAVSKYKKAPS-----SSSS----- 115  
 HU4- PspC3 61 EYLNHGLSVS---KKKSEAE-LPSEIKAKLDAAFEQFKKDTLPTEPGKKVAEAEKKVVEEAKKKAEDQKEKDLRNYPTNTYK 136  
 HU5- PspC3 61 EYLNHGLSVS---KEKSEAE-LPSKIKAE LDAAFENFKKDTL----- 97  
 HU6A- PspC3 62 EYLYGL-----KEKSEAE-LPSEVKAKLDAAFEQFKKDTL--KLGEKVAEAEKKVAEAEKKAKAQKEGDRRNYPTITYK 132  
 HU6B- PspC4 62 KYLYGLKEKS---EAELTL-KTKETKEELTAAFEQFKKDTL-----KSGKKVAEAEKKAKAQKEEDRRNYPTNTYK 128  
 HU6B- PspC10 300 TYLYKFDEST--QKAQLQE-LVTESQSKLDEAFSKFKNGLS-----SSSS----- 342  
 HU7F- PspC6 62 TYLYELNVL---EDKSKAE-LPSKIKAKLDAAFEQFKKDTLPTEPGKKVAEAKKKVVEEAKKAKAQKEEDHRNYPTITYK 137  
 HU9V- PspC3 61 EYLNHGLSVS---KKKSEAE-LPSEIKAKLDAAFEQFKKDTLPTEPGKKVAEAEKKVVEEAKKKAEDQKEKDLRNYPTNTYK 136  
 HU14- PspC3 61 EYLNHGLSVS---KKKSEAE-LPSEIKAKLDAAFEQFKKDTLPTEPGKKVAEAEKKVVEEAKKKAEDQKEKDLRNYPTNTYK 136  
 HU18C-PspC6 60 KYFYELNVL---KEKSKKEELTSKTKEELTAAFEKFKKDTLKL--GEKVAEAEKKVAEAEKKAKAQKEEDRRNYPTNTYK 134  
 HU19A-PspC5 75 KYLYELRVL---KEKSKKEELTSKTKEELDAAFEKFKKEP-----ELTKKLAEAKQKAKAQKEEDFRNYPTNTYK 141  
 HU19F-PspC9 74 RYLNEIVHST--SKSQLQE-LMMKSQSEVDEAVSKFEKDSF-----SSSS----- 116  
 HU23F-PspC3 62 EYLYGL-----KEKSEAE-LPSEVKAKLDAAFEQFKKDTL--KLGEKVAEAEKKVAEAEKKAKAQKEEDRRNYPTITYK 132

D39- PspC3 136 TLELEIAEFDVKVKEAELELVKKEEAKE--SRNEGTIKQAKEKVESKK-----AEATRLENIKTDRKKAEE 198  
 HU1- PspC6 -----  
 HU3- PspC8 -----  
 HU4- PspC3 137 TLELDIAESDVEVKKAELELVKKEEAKE--SRDEKKINQAKAKVENKK-----AEATRLKNIKTDREKAE 199  
 HU5- PspC3 -----  
 HU6A- PspC3 133 TLDLEIAESDVEVKKAELELLKKEEAK---TRNKDTINQAKAKVESKQ-----AEATRLKKIKTDREQAET 194  
 HU6B- PspC4 129 TIELEIAEAEVGVAKAELELEFAQAQVQIPQDTEKINAASKVEAAK-----SNVKKLEKIKSDIEKTYL 193  
 HU6B- PspC10 -----  
 HU7F- PspC6 138 TLEPEIAESDVKVKEAELELVKKEADE--SRNEGTINQAKAKVESEQ-----AEATRLKKIKTDREKAE 200  
 HU9V- PspC3 137 TLELDIAESDVEVKKAELELVKKEEAKE--SRDEKKINQAKAKVENKK-----AEATRLKNIKTDREKAE 199  
 HU14- PspC3 137 TLELDIAESDVEVKKAELELVKKEEAKE--SRDEKKINQAKAKVENKK-----AEATRLKNIKTDREKAE 199  
 HU18C-PspC6 135 TLELEIAESDGEVKKAELELLKKEA-K--TRNEDTINQAKAKVESKQ-----AEATRLKIKTERKEAEE 196  
 HU19A-PspC5 142 TLELEIAEFDVKVKEAELELVKKEEAK---PRNEEKIKQAKAKVESKKAATRLLEEIKTERKKAEEEAERKAESEKKAEE 218  
 HU19F-PspC9 -----  
 HU23F-PspC3 133 TLDLEIAESDVEVKKAELELLKKEEAK---TRNKDTINQAKAKVESKQ-----AEATRLKKIKTDREQAET 194

|        |        |     |                                                                                  |     |
|--------|--------|-----|----------------------------------------------------------------------------------|-----|
| D39-   | PspC3  | 199 | EA-----KRRADAKLKE-----ANVATSDQGKPKGRAKRGVPGELATP                                 | 236 |
| HU1-   | PspC6  |     | -----                                                                            |     |
| HU3-   | PspC8  | 116 | ---GSSTKPE-TPQ-RKHQN-----                                                        | 130 |
| HU4-   | PspC3  | 200 | -A-----KRRADAKLQE-----ANVATSEQDKSKRRRAKREVLGELATP                                | 236 |
| HU5-   | PspC3  |     | -----                                                                            |     |
| HU6A-  | PspC3  | 195 | TR-----LENIKTDRKK-----AEEEAKVKAKPKKRTKRGALGEPATP                                 | 232 |
| HU6B-  | PspC4  | 194 | YKLDNSTKET--PKPRVRRN-----SP---EIKAKGRVKNYEE-----ANIE-----LSKYMTD                 | 237 |
| HU6B-  | PspC10 | 343 | ---GSSTKPE-TPQPEKPEH-----                                                        | 358 |
| HU7F-  | PspC6  | 201 | EA-----KRRADAKEQD-----ESKRRKSRGKRGALGEQATP                                       | 232 |
| HU9V-  | PspC3  | 200 | -A-----KRRADAKLQE-----ANVATSEQDKSKRRRAKREVLGELATP                                | 236 |
| HU14-  | PspC3  | 200 | -A-----KRRADAKLQE-----ANVATSEQDKSKRRRAKREVLGELATP                                | 236 |
| HU18C- | PspC6  | 197 | EA-----KRRADAKLQE-----ANVATSEQEPKRRVKRGALGEQATP                                  | 234 |
| HU19A- | PspC5  | 219 | AKQKVDTKEQGKPKRRAKRGVSGELATPDKKENDAKSSDSSVGEETLPSPSLNMANESQTEHRKDVDEYIKKMLGEIQLD | 298 |
| HU19F- | PspC9  | 117 | ---GSSTKPE-TPQPENPEH-----                                                        | 132 |
| HU23F- | PspC3  | 195 | TR-----LENIKTDRKK-----AEEEAKVKAKPKKRTKRGALGEPATP                                 | 232 |

|        |        |     |                                                                                 |     |
|--------|--------|-----|---------------------------------------------------------------------------------|-----|
| D39-   | PspC3  | 237 | DKK-----ENDAKSSDSSVGEETLPSS-----SLKSGKKVAEAEKKVEEAEKKAKDQ                       | 283 |
| HU1-   | PspC6  | 101 | -----ELTKKVAEAQKKVEEAKKKAEDQ                                                    | 123 |
| HU3-   | PspC8  |     | -----                                                                           |     |
| HU4-   | PspC3  | 237 | DKK-----ENDARSSDSSVGEETLTSP-----SLKPEKKVAEAEKKVEEAKKKAEDQ                       | 283 |
| HU5-   | PspC3  | 98  | -----KPGEKVAEAKKKVEEAKKKAEDQ                                                    | 120 |
| HU6A-  | PspC3  | 233 | DKK-----ENDAKSSDSSVGEETLPSP-----SLKPGKKVAEAEKKVEEAEKKAKDQ                       | 279 |
| HU6B-  | PspC4  | 238 | LYK-----LDNSTKETPKSRVRRN--SP-----QVGDSRELKET---IDKAKETLSTY                      | 280 |
| HU6B-  | PspC10 |     | -----                                                                           |     |
| HU7F-  | PspC6  | 233 | DKK-----ENDAKSSDSSVGEETLPSP-----SLKPGKKVAEAEKKVEEAEKKAKAQ                       | 279 |
| HU9V-  | PspC3  | 237 | DKK-----ENDAKSSDSSVGEETLTSP-----SLKPEKKVAEAEKKVEEAKKKAEDQ                       | 283 |
| HU14-  | PspC3  | 237 | DKK-----ENDAKSSDSSVGEETLTSP-----SLKPEKKVAEAEKKVEEAKKKAEDQ                       | 283 |
| HU18C- | PspC6  | 235 | DKK-----ENDAKSSDSSVGEETLPSP-----SLKPEKKVAEAEKKVAEAEKKAKAQ                       | 281 |
| HU19A- | PspC5  | 299 | RRKHTQNVNLNIKLSAIKTKYLYELSVLKENSKEELTSKTKAELTAAFEQFKKDTLKPEKKVAEAEKKVEEAKKKAEDQ | 378 |
| HU19F- | PspC9  |     | -----                                                                           |     |
| HU23F- | PspC3  | 233 | DKK-----ENDAKSSDSSVGEETLPSP-----SLKPGKKVAEAEKKVEEAEKKAKGQ                       | 279 |

|        |        |     |                                                                                  |     |
|--------|--------|-----|----------------------------------------------------------------------------------|-----|
| D39-   | PspC3  | 284 | KEEDRRNYPTNTYKTLDLLEIAESDVKVKEAELELVKEEAKEPRDEEKI-KQAKAKVESKKAETRLENIKTDRKKAE--E | 360 |
| HU1-   | PspC6  | 124 | KEEDFRNYPTNTYKTIELEIAESDVKVKEAELELLKEEAKEHRDEGTI-KQVEEKVKSEKAEATRLEKIKTERKKA---E | 199 |
| HU3-   | PspC8  | 131 | -----QRLNQE-----                                                                 | 136 |
| HU4-   | PspC3  | 284 | KEEDRRNYPTNTYKTLELEIAESDVEVKKAELELVKEEAKESRNEEKI-KQVKAKVESKKAETRLENIKTDRKKAE-EE  | 361 |
| HU5-   | PspC3  | 121 | KEEDRRNYPTNTYKTLELEIAEFDVKVKEAELELVKEEAKEPRDEEKI-KQAKEKVESKKAETRLEKIKTDRKKA---E  | 196 |
| HU6A-  | PspC3  | 280 | KEEDRRNYPTITYKTLELDIAESDVEVKKAELELVKEEAKESRDKEKI-KQAKAEVESKKAETRLEKIKTDRKKAE-EE  | 357 |
| HU6B-  | PspC4  | 281 | MVTRLTKLDPSVFWFADLLM---DAKKVVEEYKTKLEDASDKKSVEDLRKEAEGKIESLIVTHQNREKENQPAPQPGGQA | 357 |
| HU6B-  | PspC10 | 359 | -----QKPTTPAP-----                                                               | 366 |
| HU7F-  | PspC6  | 280 | KEEDRRNYPTNTYKTLELEIAESDVKVKEAELELVKEEAKESRNEEKI-KQEKAKVESKKAETRLEKIKTDRKKA---E  | 355 |
| HU9V-  | PspC3  | 284 | KEEDRRNYPTNTYKTLELEIAESDVEVKKAELELVKGEAKESRNEEKI-KQVKAKVESKKAETRLENIKTDRKKAE-EE  | 361 |
| HU14-  | PspC3  | 284 | KEEDRRNYPTNTYKTLELEIAESDVEVKKAELELVKEEAKESRNEEKI-KQVKAKVESKKAETRLENIKTDRKKAE-EE  | 361 |
| HU18C- | PspC6  | 282 | KEEDRRNYPTNTYKTLELEIAGSDVEVKKAELELVKEEAKEPRNEEKV-KQAKAEVESKQAEATRLEKIKTDRKKAE--E | 358 |
| HU19A- | PspC5  | 379 | KEEDRRNYPTNTYKTLELEIAESDVRVKEAELELVKEEASESRNEEKI-KQAKEKVESKKAETRLEKIKTDRKKAE--E  | 455 |
| HU19F- | PspC9  | 133 | -----QKPTTPSP-----                                                               | 140 |
| HU23F- | PspC3  | 280 | KEEDRRNYPTITYKTLELDIAESDVEVKKAELELVKEEAKESRDKEKI-KQAKAEVESKKAETRLEKIKTDRKKAE-EE  | 357 |

|        |        |     |                                                                                   |     |
|--------|--------|-----|-----------------------------------------------------------------------------------|-----|
| D39-   | PspC3  | 361 | EAKRKAEEEDK---VKEK-----                                                           | 375 |
| HU1-   | PspC6  | 200 | EAKRKAEEEDK---VKEK-----                                                           | 214 |
| HU3-   | PspC8  |     | -----                                                                             |     |
| HU4-   | PspC3  | 362 | EAKRRAAEEEDK---VKEK-----                                                          | 376 |
| HU5-   | PspC3  | 197 | EAKRKAEEEDK---VKEK-----                                                           | 211 |
| HU6A-  | PspC3  | 358 | EAKRKAEEEDK---VKEK-----                                                           | 372 |
| HU6B-  | PspC4  | 358 | GGSMVPPVVTQTPPSTSQSPGQK--ATEAEKKKLQDLIRQFQEALNKLD--DEAKTVPDGAKLTGEAGKAYNETRITYAKE | 433 |
| HU6B-  | PspC10 |     | -----                                                                             |     |
| HU7F-  | PspC6  | 356 | EAKRKAEEEDK---VKEK-----                                                           | 370 |
| HU9V-  | PspC3  | 362 | EAKRRAAEEEDK---VKEK-----                                                          | 376 |
| HU14-  | PspC3  | 362 | EAKRRAAEEEDK---VKEK-----                                                          | 376 |
| HU18C- | PspC6  | 359 | EAKRKAEEEDK---VKEK-----                                                           | 373 |
| HU19A- | PspC5  | 456 | EAKRKAEESEKKAEEAKQKVDAAEFYALEAKIAELEYEVQRPEKELKEIDESDSEDYLKEGLRAPLQSKLDTKKAKLSKLE | 535 |
| HU19F- | PspC9  |     | -----                                                                             |     |
| HU23F- | PspC3  | 358 | EAKRKAEEEDK---VKEK-----                                                           | 372 |

|        |        |                                                                                       |     |
|--------|--------|---------------------------------------------------------------------------------------|-----|
| D39-   | PspC3  | -----                                                                                 |     |
| HU1-   | PspC6  | -----                                                                                 |     |
| HU3-   | PspC8  | -----                                                                                 |     |
| HU4-   | PspC3  | -----                                                                                 |     |
| HU5-   | PspC3  | -----                                                                                 |     |
| HU6A-  | PspC3  | -----                                                                                 |     |
| HU6B-  | PspC4  | 434 VVDKSKKLLSQTAVTMDDELAMQLTKLNDAMSKLKEAKAKLVPEVKPQPENPEPKPQPEGEKPSVPDINQEKEKAKLAIAT | 513 |
| HU6B-  | PspC10 | 367 -----DTKPSPQPEGKKPSVPDINQEKEKAKLAVAT                                              | 397 |
| HU7F-  | PspC6  | -----                                                                                 |     |
| HU9V-  | PspC3  | -----                                                                                 |     |
| HU14-  | PspC3  | -----                                                                                 |     |
| HU18C- | PspC6  | -----                                                                                 |     |
| HU19A- | PspC5  | 536 ELSDKIDELDAEIAKLEVQLKDAEGNNNVEAYFKEGLEKTTAEKKAELEKAEADLKKAVDE-----                | 596 |
| HU19F- | PspC9  | 141 -----DTKPSPQPEGKKPSVPDINQEKEKAKLAVVT                                              | 171 |
| HU23F- | PspC3  | -----                                                                                 |     |

|        |        |                                                                                      |     |
|--------|--------|--------------------------------------------------------------------------------------|-----|
| D39-   | PspC3  | -----                                                                                |     |
| HU1-   | PspC6  | -----                                                                                |     |
| HU3-   | PspC8  | -----                                                                                |     |
| HU4-   | PspC3  | -----                                                                                |     |
| HU5-   | PspC3  | -----                                                                                |     |
| HU6A-  | PspC3  | -----                                                                                |     |
| HU6B-  | PspC4  | 514 YMSKILDDIKKHHLRKEKHHQIVALIKDLKDKKKQALSEIDNVNTKVEIENTVHKVFAAMDTVVTKFQKGLIQNTPQV-- | 591 |
| HU6B-  | PspC10 | 398 YMSKILDDIQKHHLQKEKHRQIVALIKELDELKKQALSEIDNVNTKVEIENTVHKIFADMDAVVTKFKKGLTQDTPKEPG | 477 |
| HU7F-  | PspC6  | -----                                                                                |     |
| HU9V-  | PspC3  | -----                                                                                |     |
| HU14-  | PspC3  | -----                                                                                |     |
| HU18C- | PspC6  | -----                                                                                |     |
| HU19A- | PspC5  | -----                                                                                |     |
| HU19F- | PspC9  | 172 YMSKILDDIQKHHLQKEKHRQIVALIKELDELKKQALSEIDNVNTKVEIENTVHKIFADMDAVATKFKKGLTQDTPKEPG | 251 |
| HU23F- | PspC3  | -----                                                                                |     |

|        |        |                      |     |
|--------|--------|----------------------|-----|
| D39-   | PspC3  | -----                |     |
| HU1-   | PspC6  | -----                |     |
| HU3-   | PspC8  | -----                |     |
| HU4-   | PspC3  | -----                |     |
| HU5-   | PspC3  | -----                |     |
| HU6A-  | PspC3  | -----                |     |
| HU6B-  | PspC4  | -----                |     |
| HU6B-  | PspC10 | 478 NKKPSAPKPGMQPSPQ | 493 |
| HU7F-  | PspC6  | -----                |     |
| HU9V-  | PspC3  | -----                |     |
| HU14-  | PspC3  | -----                |     |
| HU18C- | PspC6  | -----                |     |
| HU19A- | PspC5  | -----                |     |
| HU19F- | PspC9  | 252 NKKPSA-----      | 257 |
| HU23F- | PspC3  | -----                |     |
