# Supplementary material
Source: PubMed Central journal article supplement (PMC3318277)
Supplement: supp_19.4.499_CVI-CVI05706-11-s03.pdf [file supp_19.4.499_CVI-CVI05706-11-s03.pdf]

**Supplemental Figure 1. Alignment of PspC sequences.** PspC sequences were aligned using COBALT Multiple sequence alignment tool ([http://www.ncbi.nlm.nih.gov/tools/cobalt/cobalt.cgi?link\\_loc=BlastHomeAd](http://www.ncbi.nlm.nih.gov/tools/cobalt/cobalt.cgi?link_loc=BlastHomeAd)). Aminoacids identical to the motif ALNIKLSAIKTK of D39 for FH binding are shown in blue and the conserved aminoacids at positions 2 (leucine), 6 (leucine), 9 (isoleucine) and 10 (lysine) are highlighted in blue. The sIgA hexpeptide motif R(Y or H or F or L) RNYPT is shown in red and the YPT critical aminoacids for binding are highlighted in yellow.

**Supplemental Figure 2. Densitometric analysis of Western Blot bands in Figure 3.** Density of bands of the indicated strains in blots incubated with anti-PspC3 or anti-PspC5 IgG in Figure 3 were determined using ImageJ (<http://rsb.info.nih.gov/ij>) and are indicated as percentage of the same bands in blots incubated with the control anti-Intimin IgG before detection of FH (A) or sIgA (B).
