# Supplementary material
Source: PubMed Central journal article supplement (PMC3318277)

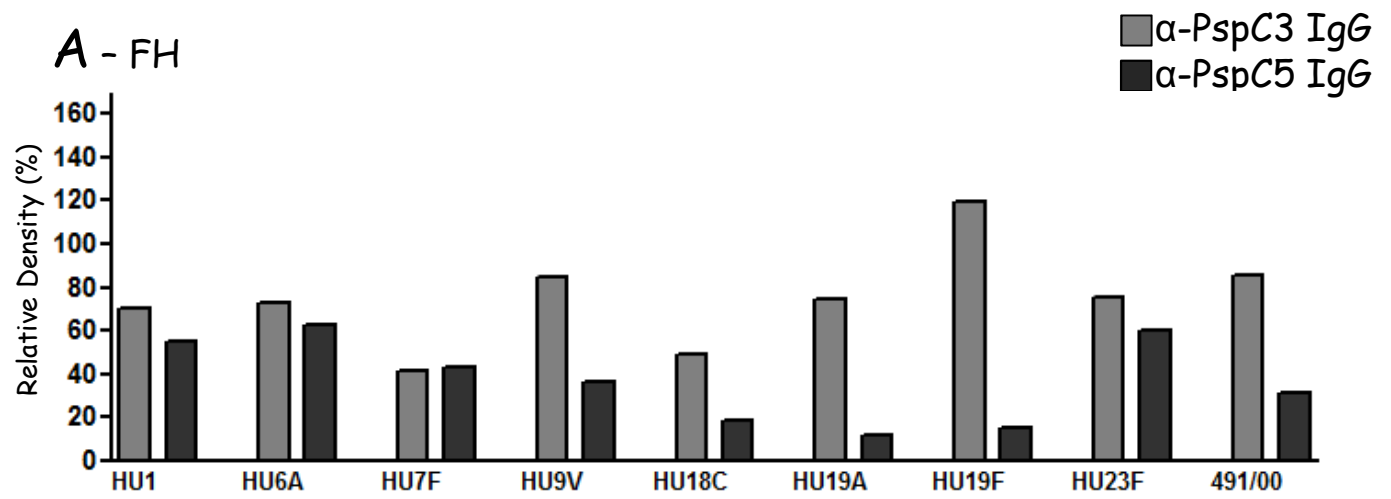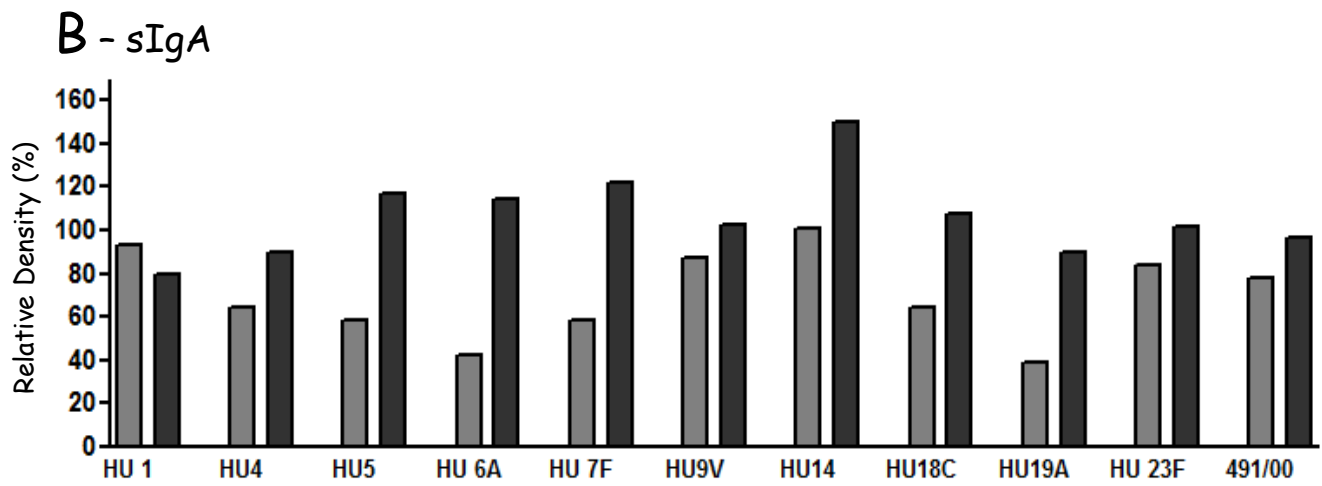

Supplemental Figure 2

Supplement: supp_19.4.499_CVI-CVI05706-11-s02.pdf [file supp_19.4.499_CVI-CVI05706-11-s02.pdf]
